# Supplementary material for: Pilot Study to Develop and Test Palliative Care Quality Indicators for Nursing Homes
Source: Preprints.org preprint supplement (doi:10.20944/preprints202012.0424.v1), 2020-12-17
Supplement: Supplementary file 1 [file supplementary]

**Table S1: list of quality indicators with numerators, denominators and questions**

| **Domain: Physical aspects of care** | | | | | |
| --- | --- | --- | --- | --- | --- |
| N° | Short title | Numerator and denominator of the indicator | Respondent | Question | Evidence |
| PC-1 | Being in pain | Numerator: Number of residents with a pain score of 3 or more in the last three days  Denominator: all residents who stayed longer than 1 month in the nursing home, with whom the indicator was measured | Residents | Please tick the box that best describes how pain has affected you over the past 3 days:   - not at all, - slightly, - moderately, - severely, - overwhelmingly | Indicator developed by researchers and expert panel  Measurement question from “IPOS-5” |
| **Domain: Psychological, social or spiritual aspects of care** | | | | | |
| N° | Short title | Numerator and denominator of the indicator | Respondent | Question | Source |
| PC-2 | Feeling worried or anxious, or a burden | Numerator: Number of residents who indicate they were most of the times or always feeling worried or anxious, or a burden to others  Denominator: all residents who stayed longer than 1 month in the nursing home, with whom the indicator was measured | Residents | Are you feeling worried or anxious, or a burden to others?   - always - often - sometimes - rarely | Indicator developed by researchers and expert panel  Measurement question adapted from “ICECAP-SCM” |
| PC-3 | Being around people who care about you | Numerator: Number of residents who indicate that they were most of the times or always able to be around people who cared about them  Denominator: all residents who stayed longer than 1 month in the nursing home, with whom the indicator was measured | Residents | If I want to, I am able to be with people who care about me:   - most of the time - some of the time - only a little of the time - never | Indicator developed by researchers and expert panel  Measurement question from “ICECAP-SCM” |
| **Domain: Autonomy and dignity** | | | | | |
| N° | Short title | Numerator and denominator of the indicator | Respondent | Question | Source |
| PC-4 | Personal wishes and beliefs respected | Numerator: Number of residents who indicate that their caregivers most of the times or always respecting their personal wishes and beliefs  Denominator: all residents who stayed longer than 1 month in the nursing home, with whom the indicator was measured | Residents | Do your professional carers take your personal wishes and beliefs into account?   - most of the time - some of the time - only a little of the time - never | Indicator originally from Claessen et al: ‘‘extent to which patients  experience respect for their autonomy’’  Measurement question from “QPAC study” |
| PC-5 | Decisions about life and care | Numerator: Number of residents who indicate that they most of the times or always can make their own decisions about their life and care  Denominator: all residents who stayed longer than 1 month in the nursing home, with whom the indicator was measured | Residents | I am able to make decisions that I need to make about my life and care:   - most of the time - some of the time - only a little of the time - never | Indicator developed by researchers and expert panel  Measurement question from “ICECAP-SCM” |
| PC-6 | Treated with respect | Numerator: Number of residents who indicate that they most of the times or always were treated with respect  Denominator: all residents who stayed longer than 1 month in the nursing home, with whom the indicator was measured | Residents | Do you feel treated with respect? (respectfully addressed, respect for beliefs, being yourself, having privacy):   - most of the time - some of the time - only a little of the time - never | Indicator developed by researchers and expert panel  Measurement question adapted from “ICECAP-SCM” |
| **Domain: Communication with residents** | | | | | |
| N° | Short title | Numerator and denominator of the indicator | Respondent | Question | Source |
| ACP-1 | Information comprehensible and not contradictory | Numerator: Number of residents who indicate that they most of the times or always receive comprehensible information and almost never of never contradictory information  Denominator: all residents who stayed longer than 1 month in the nursing home, with whom the indicator was measured | Residents | Do your professional carers explain things to you understandably?   - Never - Sometimes - Usually - Always   Do your professional carers give you conflicting information?   - Never - Sometimes - Usually - Always | Indicator originally from Claessen et al: ‘‘extent to which  patients indicate that they receive understandable  explanations’’ and ‘‘extent to which patients indicate that  they receive contradictory information’’  Measurement question from “QPAC study” |
| **Domain: Care planning** | | | | | |
| N° | Short title | Numerator and denominator of the indicator | Respondent | Question | Source |
| ACP-2 | Conversation with family | Numerator: Number of residents for whom the next-of-kin indicates that more than once a conversation took place with the caregivers, the next-of-kin and, when possible, the resident  Denominator: all residents who stayed longer than 1 month in the nursing home, for whom the indicator was measured | Next-of-kin | How often did the professional carers organize a meeting, to which you and your relative were invited?   - More than once - Once - Never | Indicator adapted from QPAC study: “a conversation  about their care preferences took place between the  professional caregivers and family carers in the first week  after admission or start of palliative care”  Measurement question adapted from “QPAC study” |
| ACP-3 | Knowledge about care goals and life wishes | Numerator: Number of residents for whom their professional caregiver indicates that they have knowledge about the residents’ care goals and life wishes.  Denominator: all residents who stayed longer than 1 month in the nursing home, for whom the indicator was measured | Professional caregiver | Do you know the care goals and life wishes of this resident?   - Yes - No | Indicator developed by researchers and expert panel  Measurement question developed by researchers |
| ACP-4 | Encouraging ACP | Numerator: Number of residents for whom their professional caregiver indicates that they often or very often encourage residents and their next-of-kins to involve in advance care planning.  Denominator: all residents who stayed longer than 1 month in the nursing home, for whom the indicator was measured | Professional caregiver | I encourage residents and families to complete advanced care planning:   - Very much - Much - Neither much, nor little - Little - Very little | Indicator developed by researchers and expert panel  Measurement question from “PACE LTCF staff attitudes- communication and end-of-life care” |
| **Domain: care and communication for next-of-kin** | | | | | |
| N° | Short title | Numerator and denominator of the indicator | Respondent | Question | Source |
| ACP-5 | Next-of-kin involved in decisions | Numerator: Number of next-of-kin who indicate that they often or very often felt involved in the decisions taken about the resident.  Denominator: all residents who stayed longer than 1 month in the nursing home, for whom the indicator was measured | Next-of-kin | I felt fully involved in all decision making of my relative:   - Very much - Much - Neither much, nor little - Little - Very little | Indicator developed by researchers and expert panel  Measurement question from “SWC-EOLD” |
| EOL-1 | Information about approaching death | Numerator: umber of next-of-kin who indicate that they received the right amount of information on the approaching death of the resident.  Denominator: all residents who stayed longer than 1 month in the nursing home, for whom the indicator was measured | Next-of-kin | Did you get information about the impending death of your relative?   - less than necessary - just the right amount - more than necessary | Indicator of QPAC study “Family received the right  amount of information about the patient’s approaching  death”  Measurement question of “QPAC study”  *Modified indicator from Miyashita et al: ‘‘explanation to*  *family of patient’s impending death’’* |
| PC-7 | Attention for wishes and feelings of next-of-kin | Numerator: Number of next-of-kin who indicate that the professional caregivers had attention for their wishes and feelings.  Denominator: all residents who stayed longer than 1 month in the nursing home, for whom the indicator was measured | Next-of-kin | The health care team was sensitive to my needs and feeling:   - Very much - Much - Neither much, nor little - Little - Very little | Modified indicator from Claessen: ‘‘Extent to which,  according to the direct relatives, attention was paid to  their own psychosocial and spiritual well-being’’  Measurement question from “SWC-EOLD”  SWC-EOLD |
| EOL-2 | Supported immediate after death | Numerator: Number of next-of-kin who indicate that they felt sufficiently supported by the professional caregivers immediate after the death of the resident.  Denominator: all residents who stayed longer than 1 month in the nursing home, for whom the indicator was measured | Next-of-kin | Did you feel supported by the professional carers immediately after the death of your relative?   - Yes - No | Indicator from Claessen et al: ‘‘Extent to which direct  relatives felt supported by the caregivers immediately  after the patient’s death,’’  Measurement question from “QPAC study” |
| **Domain: Communication among caregivers** | | | | | |
| N° | Short title | Numerator and denominator of the indicator | Respondent | Question | Source |
| PC-8 | Information in resident file | Numerator: Number of residents for whom the professional caregiver finds sufficient information in the resident file when needed.  Denominator: all residents who stayed longer than 1 month in the nursing home, for whom the indicator was measured | Professional caregiver | Do you find the information on the resident in his or her file when you need it?   - Never - Sometimes - Usually - Always | Indicator developed by researchers and expert panel  Measurement question developed by researchers |
| **Domain: care and circumstances surrounding death** | | | | | |
| N° | Short title | Numerator and denominator of the indicator | Respondent | Question | Source |
| EOL-3 | Comfortable in last week of life | Numerator: Number of next-of-kin who indicate that many or a lot of measures were taken to make the resident comfortable in the last week of life.  Denominator: all residents who stayed longer than 1 month in the nursing home, for whom the indicator was measured | Next-of-kin | All measures were taken to keep my care recipient comfortable in the last week of life:   - Very much - Much - Neither much, nor little - Little - Very little | Modified indicator from QPAC study: “symptom burden mostly or completely under control in the final week  of life”  Measurement question adapted from  “SWC-EOLD” |
| EOL-4 | Recognizing the approaching death | Numerator: Number of residents for whom the professional caregiver indicates they could recognize the approaching death well or very well by physical changes.  Denominator: all residents who stayed longer than 1 month in the nursing home, for whom the indicator was measured | Professional caregiver | I can recognize impending death (physical changes):   - Very good - Good - Neither good, nor bad - Bad - Very bad | Indicator developed by researchers and expert panel  Measurement question from “PACE LTCF staff attitudes- communication and end-of-life care” |
| EOL-5 | Satisfied by care delivered | Numerator: Number of residents for whom the professional caregiver indicates they are satisfied with the care delivered to the resident.  Denominator: all residents who stayed longer than 1 month in the nursing home, for whom the indicator was measured | Professional caregiver | Are you satisfied by the care that you and your and your team members delivered to the resident?   - Very satisfied - Satisfied - Neither satisfied, nor dissatisfied - Dissatisfied - Very dissatisfied | Indicator developed by researchers and expert panel  Measurement question from “PACE LTCF staff attitudes- communication and end-of-life care” |
| EOL-6 | Support by specialized palliative care | Numerator: Number of residents for whom the professional caregiver indicates a palliative care referent or specialized team was involved in the care for the resident.  Denominator: all residents who stayed longer than 1 month in the nursing home, for whom the indicator was measured | Professional caregiver | Was a specialized palliative care team involved in the care of this resident? (the specialized care team of the nursing home or an external team)   - Yes, the palliative care team of the nursing home - Yes, an external palliative care team - No | Indicator developed by researchers and expert panel  Measurement question developed by researchers |
